# Supplementary material
Source: publisher site journal article supplement (https://www.dovepress.com/article/465259)
Supplement: Supplementary file 1 [file get_supplementary_file.php]

# Appendix

## Case-Based Discussion (CBD)

Case-based discussion is an assessment focused on the discussion of a case record of a patient for whom the candidate has been involved in their care. Usually, the candidate selects the medical records of two or three patients they have helped manage. An assessor selects one of the records, discusses patient care with the candidate, and provides feedback after the discussion. The goal of the discussion is to assess the candidate’s clinical reasoning about the decisions made in the patient assessment, investigation, referral, treatment and follow-up. The technique can also allow assessment of the candidate’s professionalism and record keeping.

Descriptors of criteria assessed during the CBD

Clinical record keeping

- Demonstrates clarity in the structure and content of the record in the patient’s notes:
  History, physical examination, summary and problem list, management plan, procedures and operations, progress notes treatment chart.
- Creates notes that are satisfactory for use by other health professionals caring for that patient and for the doctor’s use in following up with the patient

Differential diagnosis, summary and problem list

- Provides appropriate summary/diagnostic formulation and problem list
- Relates the patient’s symptoms to the examination findings to form a diagnosis
- Appropriately communicates the clinical assessment to the patient

Management plan – Investigations, treatment and follow-up

- Demonstrates critical selection of investigations that will most efficiently assist with the diagnostic formulation and problem management
- Chooses treatment that is evidence-based and effective for the patient in his/her context
- Chooses medications and other treatments in keeping with the requirements of the health service
- Documents clearly the treatments ordered on the treatment chart
- Informs the patients and, where appropriate, obtains formal consent
- Includes follow-up as part of the discharge process from a hospital or clinic setting
- Includes investigations, treatment, prevention and patient education in the management plan
- Follow-up is made at a time appropriate for the clinical problem

Clinical judgement /clinical reasoning

- Demonstrates a successful problem-solving process, including collection of data, evaluation of information and formation of decisions about diagnosis, prognosis, treatment and prevention

Global rating

- An overall judgement of performance at the expected level of an Australian graduate at the end of PGY1.

Candidate and assessor information

AMC candidate name AMC candidate number

Assessor name Assessor position

This Case-based discussion assesses the following domains (multiple options can be selected):

[] History [] Physical Examination [] Management/Counselling

[] Clinical Judgement [] Communication Skills [] Working in a team

[] Professionalism [] Cultural Competence [] Patient Safety and Quality of Care

Patient information

Age Gender Setting(Eg ED/GP/Ward)

Real Patient Direct observation of an encounter with an actual patient is mandatory.

Candidate involved in patient’s care? [] Y [] N

Problem(s)

Please circle the Clinical area.

[] Adult medicine [] Adult surgery [] Women’s health [] Child health [] Mental health [] Emergency medicine

Please record a rating for each criterion on the scale 1 (extremely poor) to 5 (extremely good). A score of 1-2 is considered below the expected level, three is at the expected level, and 4-5 is above the expected level, the standard of an Australian graduate **at the end of PGY1**.

The criteria with no **N/O** (*not observable in this encounter*) boxes are mandatory and must be rated for each assessment. Assessors should note that over all the encounters observed, it is expected that all attributes are observed and scored at least once. Support all ratings with an explanation/example in the comments box.

| Candidate assessment criteria | Below expected level | | At expected level | Above expected level | |
| --- | --- | --- | --- | --- | --- |
| 1. Clinical record keeping | [1] | [2] | [3] | [4] | [5] |
| 2. Differential diagnosis and summary list | [1] | [2] | [3] | [4] | [5] |
| 3. Management plan – Investigations, treatment and follow-up | [1] | [2] | [3] | [4] | [5] |
| 4. Clinical judgement /clinical reasoning | [1] | [2] | [3] | [4] | [5] |

Global rating

An overall rating of this doctor’s performance and professionalism in all areas. The global rating is not an algorithmic calculation of the candidate assessment criteria ratings but a judgement about the candidate's overall performance.

[] Not competent [] Competent

Assessor comments (compulsory)

Please describe what was effective, what could be improved and your overall impression. If required, please specify suggested actions for improvement and a timeline.

Signature of assessor Signature of candidate

Date:

Observation time: Feedback time:

## Mini-CEX

The mini-clinical evaluation exercise is the process of directly observing a doctor in a focused patient encounter for assessment. It entails observing a candidate perform a focused task with an actual patient such as taking a history, examining or counselling a patient. The assessor records judgments of the candidate’s performance on a rating form and conducts a feedback session on the candidate’s performance.

Descriptors of criteria assessed during Mini-CEX

Medical Interviewing and Communication Skills

- Facilitates the patient’s telling of the story and explores the patient’s problem(s) using plain English.
- Effectively listens and uses questions/directions to obtain accurate/adequate information needed
- Responds appropriately to affect non-verbal cues and establishes rapport.

Professional/humanistic skills

- Is aware of safety issues; washes hands; maintains a professional approach to patients; demonstrates an understanding of the role of teams in patient care; attends to the patient’s needs of comfort and any disabilities; and is respectful of colleagues. Is open, honest, empathetic and compassionate.

Organisation/efficiency

- Makes efficient use of time and resources; is practised and well-organised.

History taking skills

- Uses questions effectively to obtain an accurate, adequate history with necessary information; identifies presenting problems and other active problems; identifies relevant features of past, social and family history.

Physical examination skills

- Follows an efficient and logical sequence; performs an accurate and relevant clinical examination; explains the process to the patient; correctly interprets any significant abnormal clinical signs.

Counselling, education and management skills

- Demonstrates an understanding of different cultural beliefs, values and priorities regarding their health and health care provision, and communicates effectively; manages informed consent; appropriate level of information provided; ability to use available educational resources; provides accurate information according to best practice guidelines; recommends sources of quality information.

Clinical judgement/clinical reasoning

- Integrates and interprets findings from the history and/or examination to arrive at an initial assessment, including a relevant differential diagnosis; interprets clinical information accurately; and counselling takes account of the patient’s socio-economic and psychosocial circumstances. Considers patient safety as a priority

Global rating

- An overall judgement of performance at the expected level of an Australian graduate at the end of PGY1.

.

Candidate and assessor information

AMC candidate name AMC candidate number

Assessor name Assessor position

This Case-based discussion assesses the following domains (multiple options can be selected):

[] History [] Physical Examination [] Management/Counselling

[] Clinical Judgement [] Communication Skills [] Working in a team

[] Professionalism [] Cultural Competence [] Patient Safety and Quality of Care

Patient information

Age Gender Setting(Eg ED/GP/Ward)

Real Patient Direct observation of an encounter with an actual patient is mandatory.

Problem(s)

Please circle the Clinical area.

[] Adult medicine [] Adult surgery [] Women’s health [] Child health [] Mental health [] Emergency medicine

Please record a rating for each criterion on the scale 1 (extremely poor) to 5 (extremely good). A score of 1-2 is considered below the expected level, three is at the expected level, and 4-5 is above the expected level, the standard of an Australian graduate at the end of PGY1. The criteria with no N/O (not observable in this encounter) boxes are mandatory and must be rated for each assessment. Assessors should note that over all the encounters observed, it is expected that all attributes are observed and scored at least once. Support all ratings with an explanation/example in the comments box.

|  | Below expected level | | At expected level | Above expected level | | |
| --- | --- | --- | --- | --- | --- | --- |
| 1. Medical Interviewing/Communication skills | [1] | [2] | [3] | [4] | [5] |
| 2. Professionalism / humanistic skills | [1] | [2] | [3] | [4] | [5] |
| 3. Organisation/efficiency | [1] | [2] | [3] | [4] | [5] |
| 4. History-taking skills | [1] | [2] | [3] | [4] | [5] |
| 5. Physical examination skills | [1] | [2] | [3] | [4] | [5] |
| 6. Counselling, education and management skills | [1] | [2] | [3] | [4] | [5] |
| 7. Clinical judgement/clinical reasoning | [1] | [2] | [3] | [4] | [5] |

Global rating

An overall rating of this doctor’s performance and professionalism in all areas. The global rating is not an algorithmic calculation of the candidate assessment criteria ratings but a judgement about the candidate's overall performance.

[] Not competent [] Competent

Assessor comments (compulsory)

Please describe what was effective, what could be improved and your overall impression. If required, please specify suggested actions for improvement and a timeline.

Signature of assessor Signature of candidate

Date:

Observation time: Feedback time:
